# Supplementary figures and images for: Improvement of whole-genome annotation of cereals through comparative analyses
Source: HighWire-hosted journal article supplement (doi:10.1101/gr.5881807), 2007-02-06

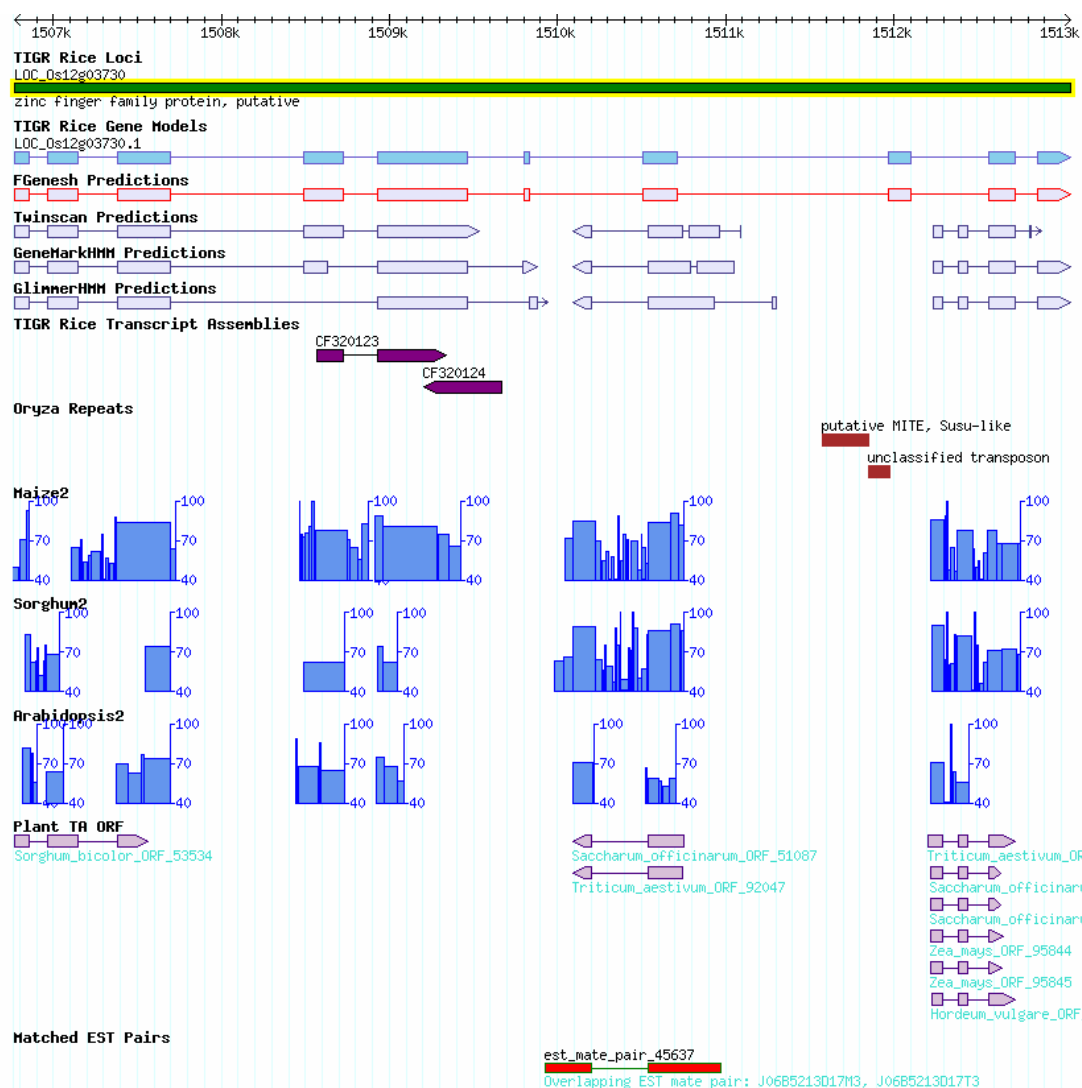

Supplemental Figure 2

Supplement: Zhu_SupplementalFig2.pdf [file Zhu_SupplementalFig2.pdf]

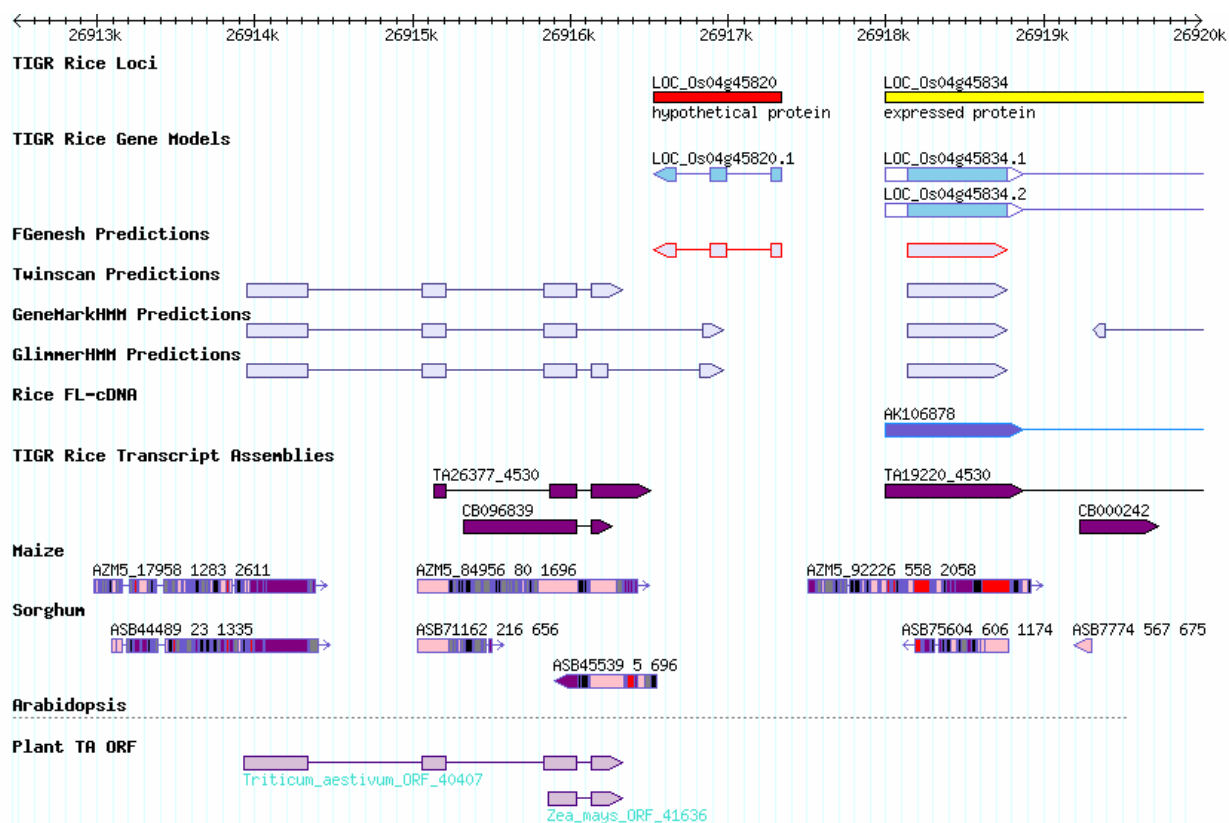

**Supplemental Figure 4**

Supplement: Zhu_SupplementalFig4.pdf [file Zhu_SupplementalFig4.pdf]

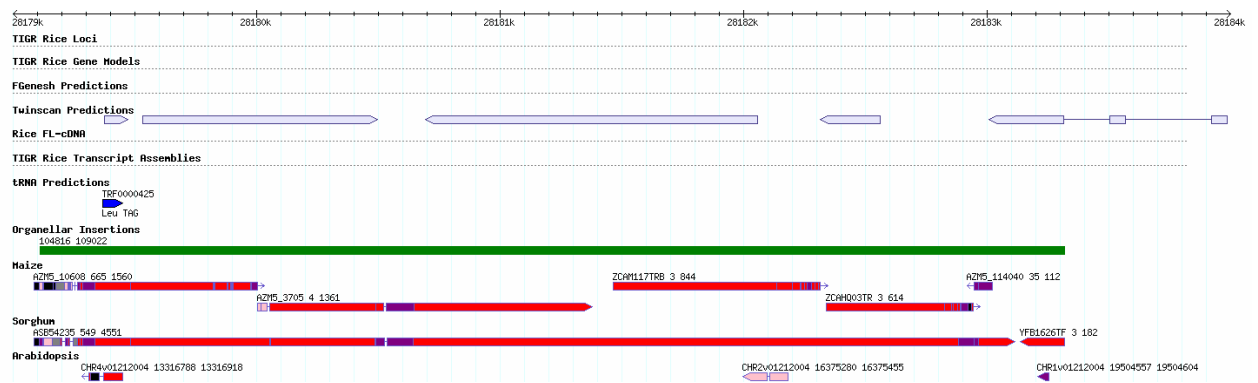

**Supplemental Figure 5**

Supplement: Zhu_SupplementalFig5.pdf [file Zhu_SupplementalFig5.pdf]

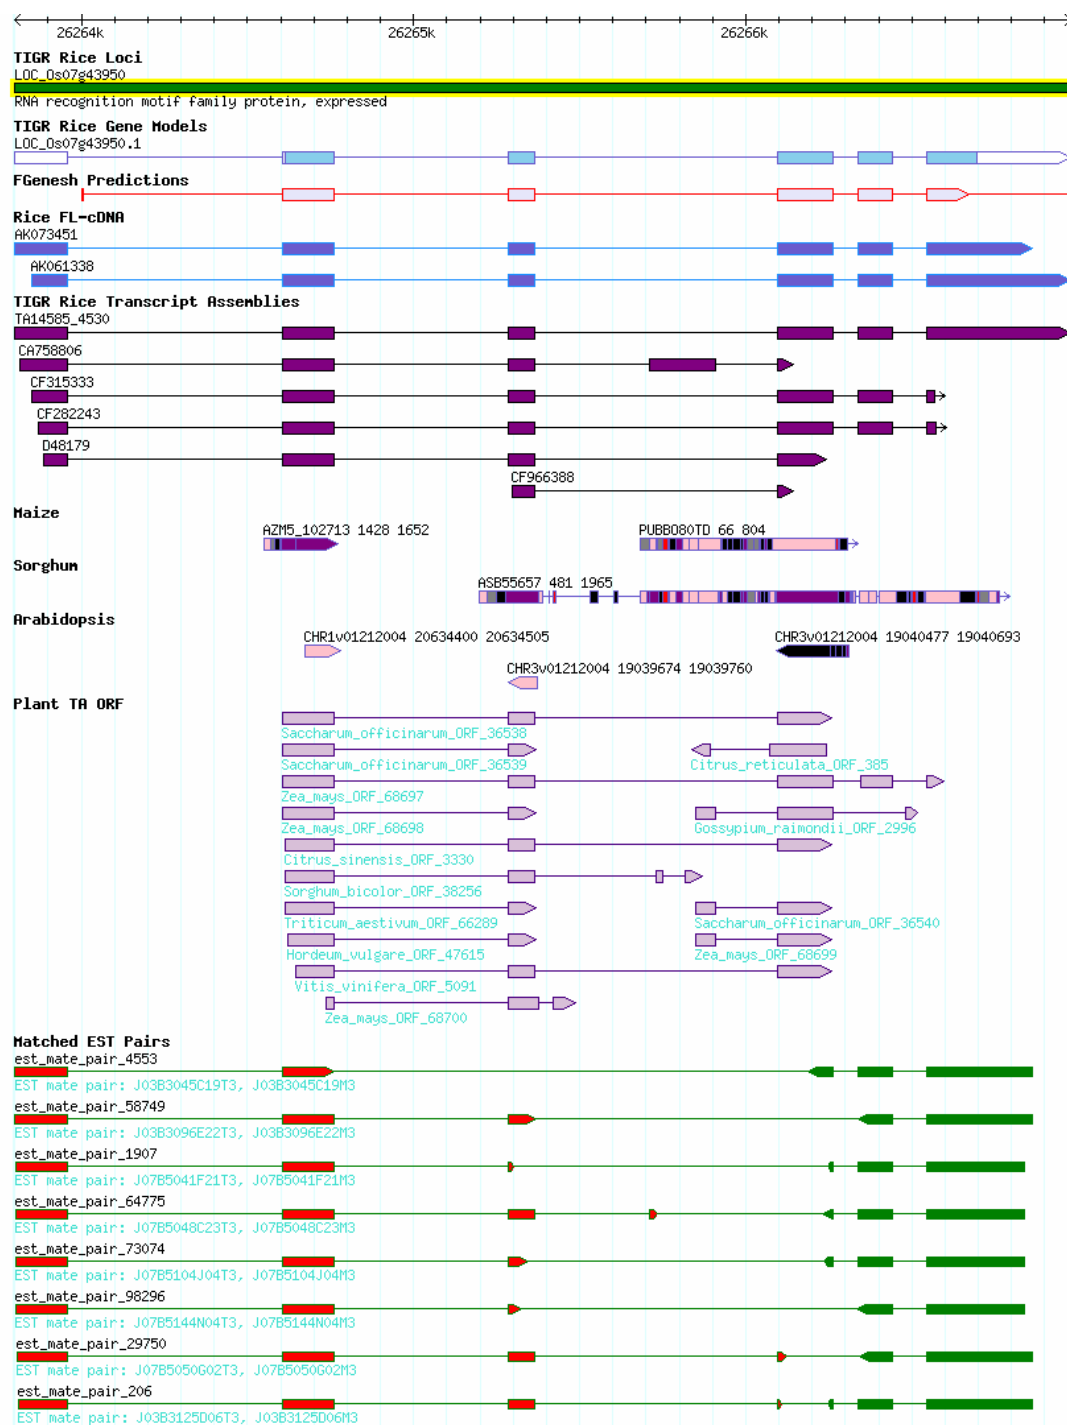

Supplemental Figure 7

Supplement: Zhu_SupplementalFig7.pdf [file Zhu_SupplementalFig7.pdf]

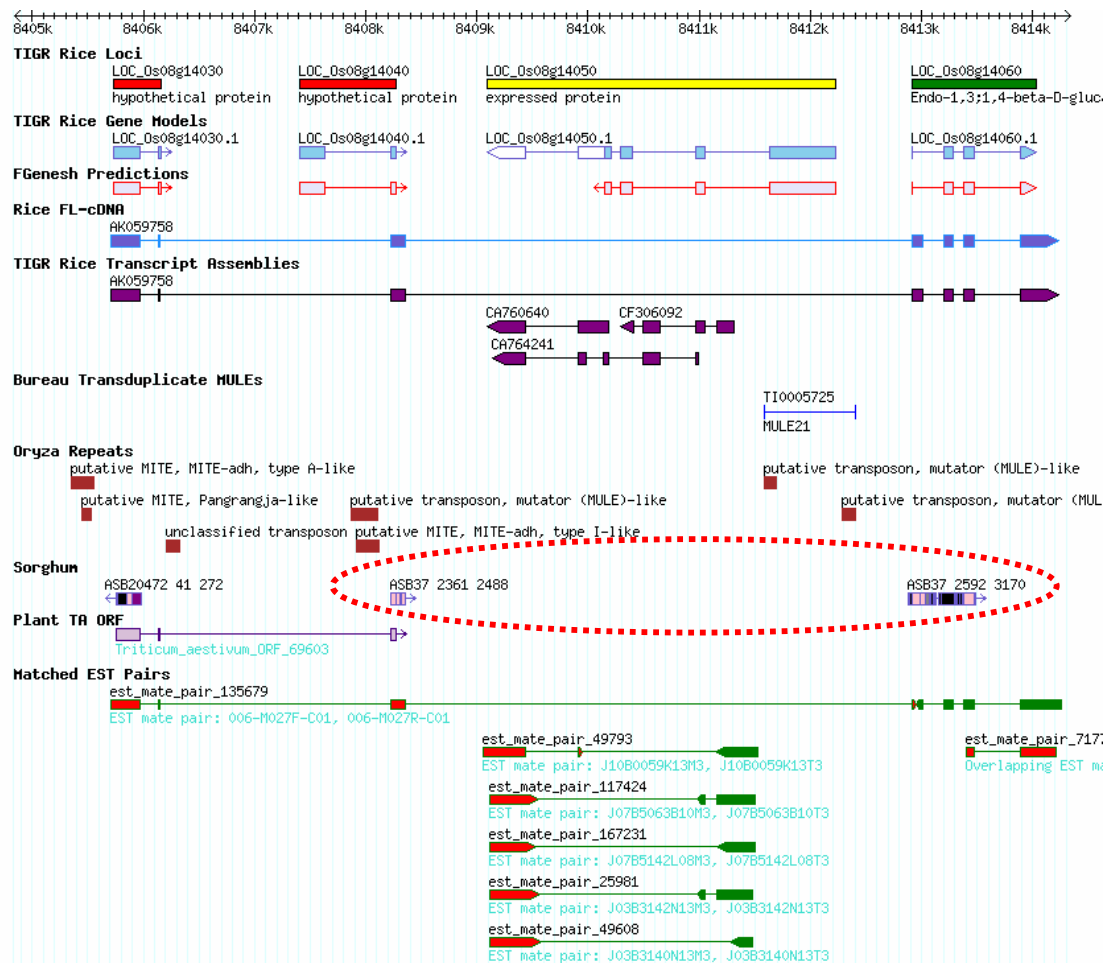

Supplemental Figure 8

Supplement: Zhu_SupplementalFig8.pdf [file Zhu_SupplementalFig8.pdf]
